# Supplementary material
Source: PubMed Central journal article supplement (PMC8552960)
Supplement: NIHMS1659721-supplement-Supplemental_Table_S1.pdf [file NIHMS1659721-supplement-Supplemental_Table_S1.pdf]

**Supplemental Table 1. List of stimuli used in each valence bias task.**

|                                                                              |              |            |          |            |           |
|------------------------------------------------------------------------------|--------------|------------|----------|------------|-----------|
| <b>WORDS</b><br>(On-screen Dimensions: 720x450 pixels)                       | <b>Pos</b>   | AMUSE      | BRAVE    | COMEDIAN   | COMIC     |
|                                                                              |              | FEMININE   | FOOD     | FRUITFUL   | GENTLEMAN |
|                                                                              |              | LEMONADE   | LOVABLE  | MOTHER     | MUSIC     |
|                                                                              |              | RABBIT     | SUNSET   | THINKER    | TREASURED |
|                                                                              | <b>Neg</b>   | CRAPPY     | CROOK    | DEADLY     | DECAY     |
|                                                                              |              | EVIL       | FUNERAL  | LAWSUIT    | MISFIRE   |
|                                                                              |              | PISS       | ROTTEN   | SLAVE      | SPINELESS |
|                                                                              |              | URINE      | USELESS  | VANDAL     | WRECK     |
|                                                                              | <b>Ambig</b> | BATTER     | BEAT     | BREAK      | CATCH     |
|                                                                              |              | CHECK      | CLOSE    | CLUB       | COURT     |
|                                                                              |              | CRUSH      | DIRECT   | DISCIPLINE | FIGHTER   |
|                                                                              |              | HAIL       | HANG     | OPERATION  | OVERCOME  |
| PICK                                                                         |              | PLAYER     | POP      | RADICAL    |           |
| RETREAT                                                                      |              | REVOLUTION | RUSH     | SHAKE      |           |
| SHRED                                                                        |              | SNAPPY     | STUN     | SURVIVAL   |           |
| TERMINAL                                                                     |              | THICK      | TRAFFIC  | TRICK      |           |
| <b>SCENES</b><br>(On-screen Dimensions: 533x400 pixels; Resolution: 72 dpi)  | <b>Pos</b>   | 1440       | 1441     | 1460       | 1710      |
|                                                                              |              | 2057       | 2091     | 2340       | 2347      |
|                                                                              |              | 2550       | 5825     | 7502       | 8380      |
|                                                                              | <b>Neg</b>   | 2717       | 7380     | 9050       | 9185      |
|                                                                              |              | 9220       | 9295     | 9421       | 9424      |
|                                                                              |              | 9432       | 9561     | 9830       | 9910      |
|                                                                              | <b>Ambig</b> | 1030       | 1303     | 1560       | 2339      |
|                                                                              |              | 2480       | 2485     | 2688       | 2704      |
|                                                                              |              | 3211       | 3310     | 3360       | 4233      |
|                                                                              |              | 4598       | 6410     | 6837       | 7430      |
|                                                                              |              | 7460       | 7570     | 7590       | 7620      |
|                                                                              |              | 8010       | 8060     | 8466       | 8501      |
| <b>FACES</b><br>(On-screen Dimensions: 256x397 pixels; Resolution: 59.5 dpi) | <b>Pos</b>   | 01F_HA_O   | 03F_HA_O | 07F_HA_O   | 08F_HA_O  |
|                                                                              |              | 24M_HA_O   | 28M_HA_O | 36M_HA_O   | 37M_HA_O  |
|                                                                              |              | AF06HAS    | AF08HAS  | AM01HAS    | AM14HAS   |
|                                                                              | <b>Neg</b>   | 01F_AN_C   | 03F_AN_C | 08F_AN_C   | 09F_AN_C  |
|                                                                              |              | 20M_AN_C   | 28M_AN_C | 36M_AN_C   | 37M_AN_C  |
|                                                                              |              | AF07ANS    | AF14ANS  | AM10ANS    | AM28ANS   |
|                                                                              | <b>Ambig</b> | 01F_SP_O   | 02F_SP_O | 06F_SP_O   | 07F_SP_O  |
|                                                                              |              | 08F_SP_O   | 09F_SP_O | 20M_SP_O   | 23M_SP_O  |
|                                                                              |              | 24M_SP_O   | 27M_SP_O | 28M_SP_O   | 36M_SP_O  |
|                                                                              |              | AF01SUS    | AF02SUS  | AF03SUS    | AF13SUS   |
|                                                                              |              | AF30SUS    | AF34SUS  | AM06SUS    | AM12SUS   |
|                                                                              |              | AM13SUS    | AM18SUS  | AM34SUS    | AM35SUS   |
